# Supplementary material for: Glutathione reductase modulates endogenous oxidative stress and affects growth and virulence in Avibacterium paragallinarum
Source: Springer Nature journal article supplement (doi:10.1186/s13567-024-01388-6), 2025-01-02

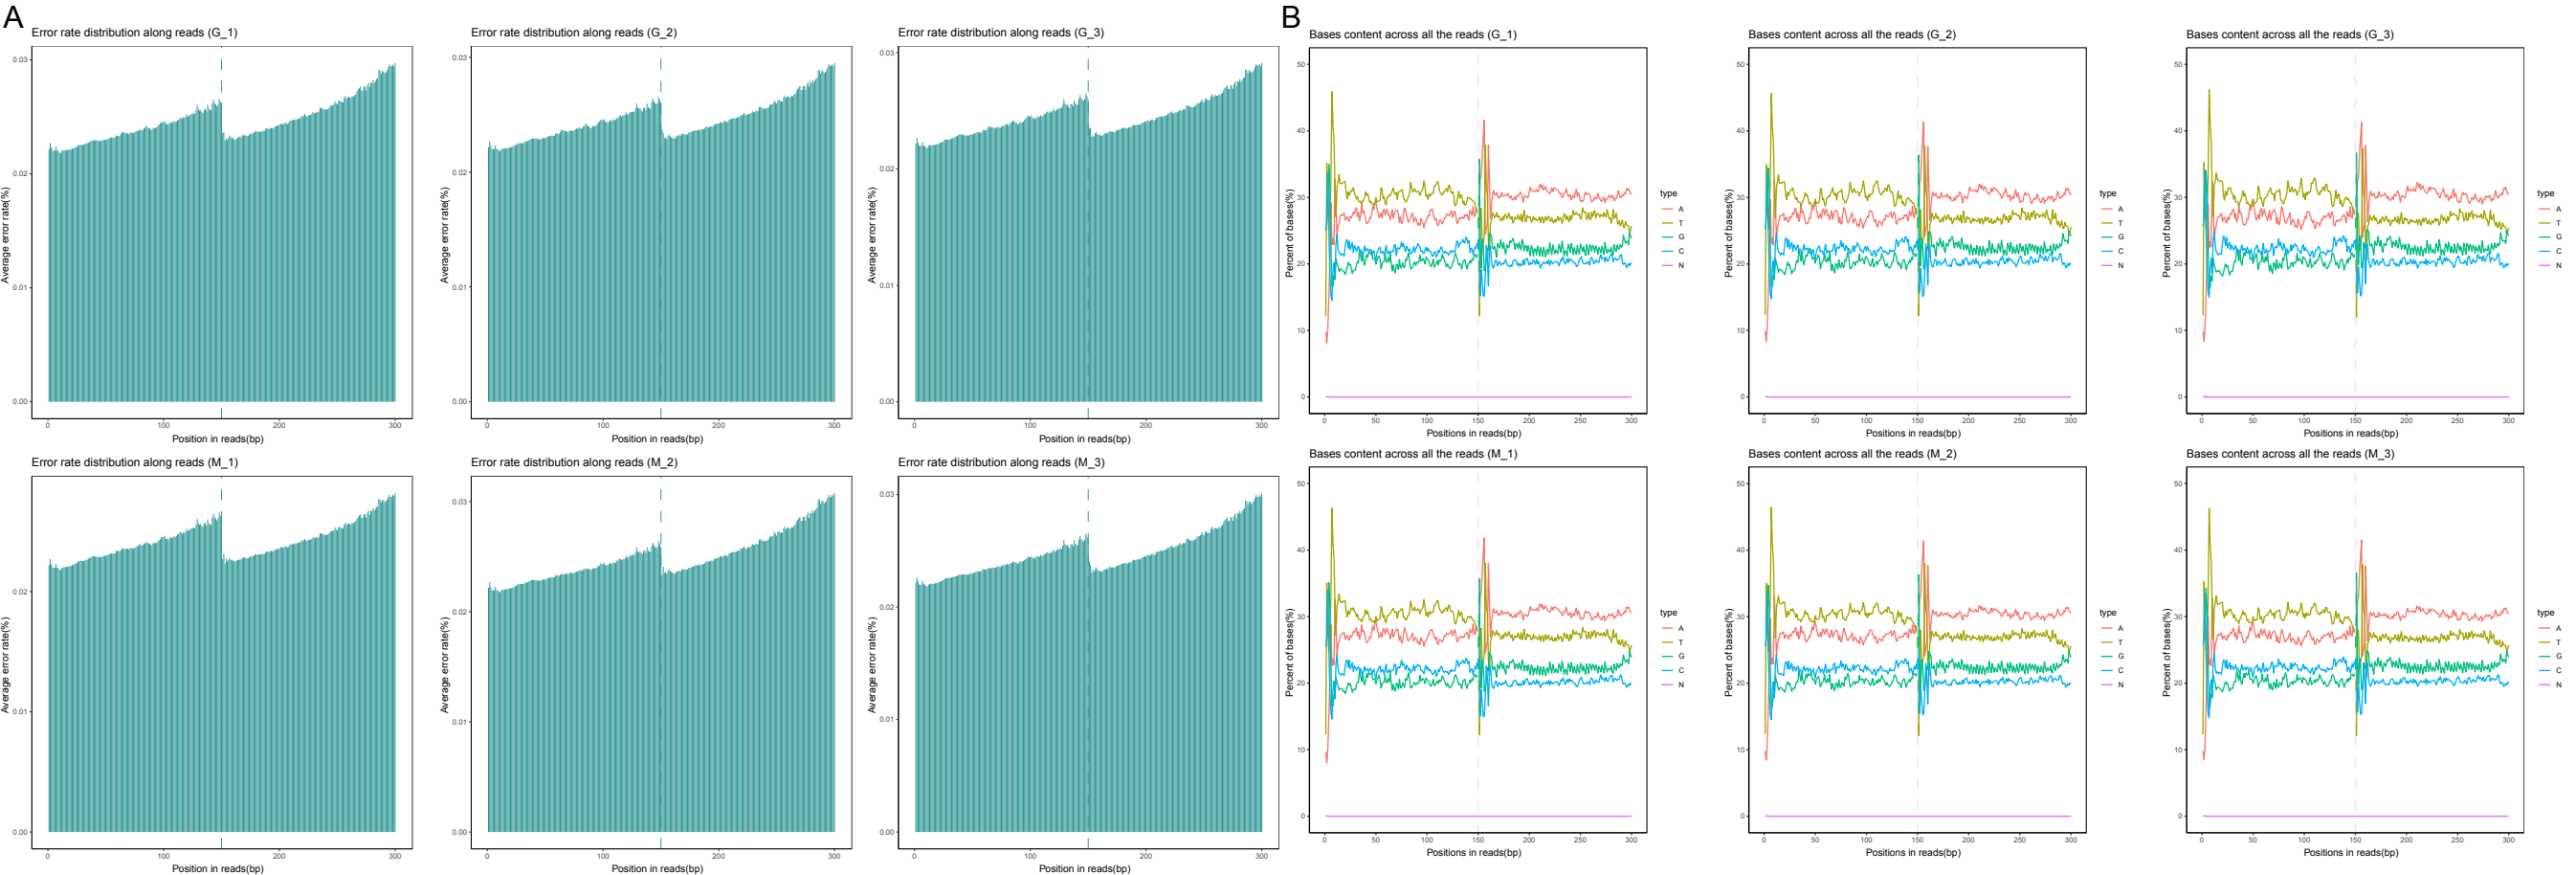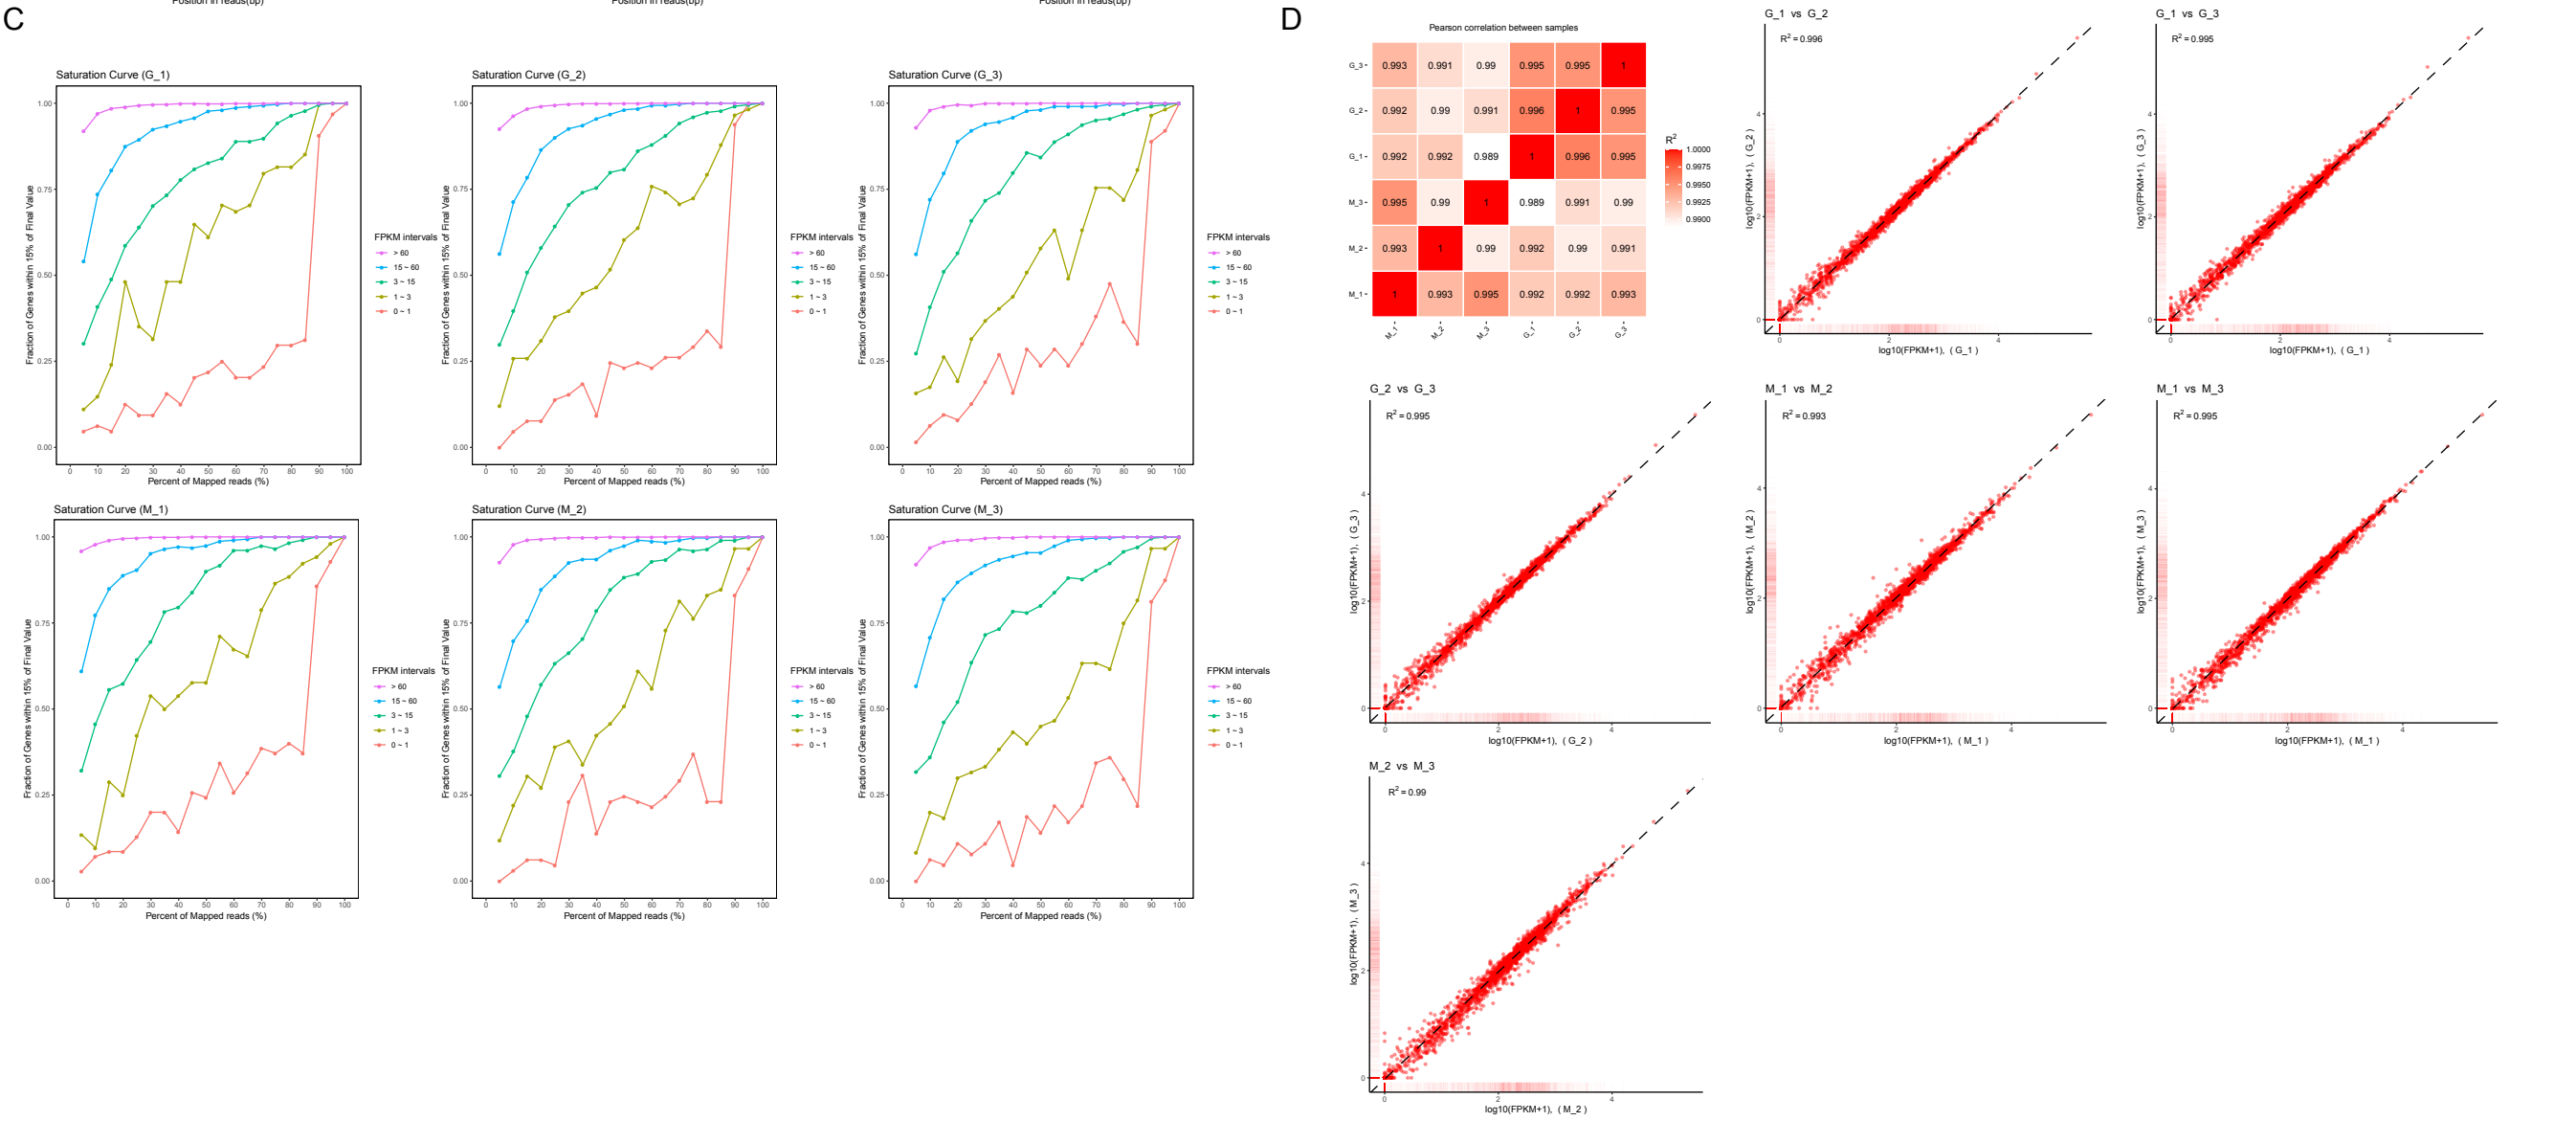

Supplement: MOESM5 [file 13567_2024_1388_MOESM5_ESM.pdf]
