# Supplementary material for: Glutathione reductase modulates endogenous oxidative stress and affects growth and virulence in Avibacterium paragallinarum
Source: Springer Nature journal article supplement (doi:10.1186/s13567-024-01388-6), 2025-01-02
Supplement: MOESM8 [file 13567_2024_1388_MOESM8_ESM.pdf]

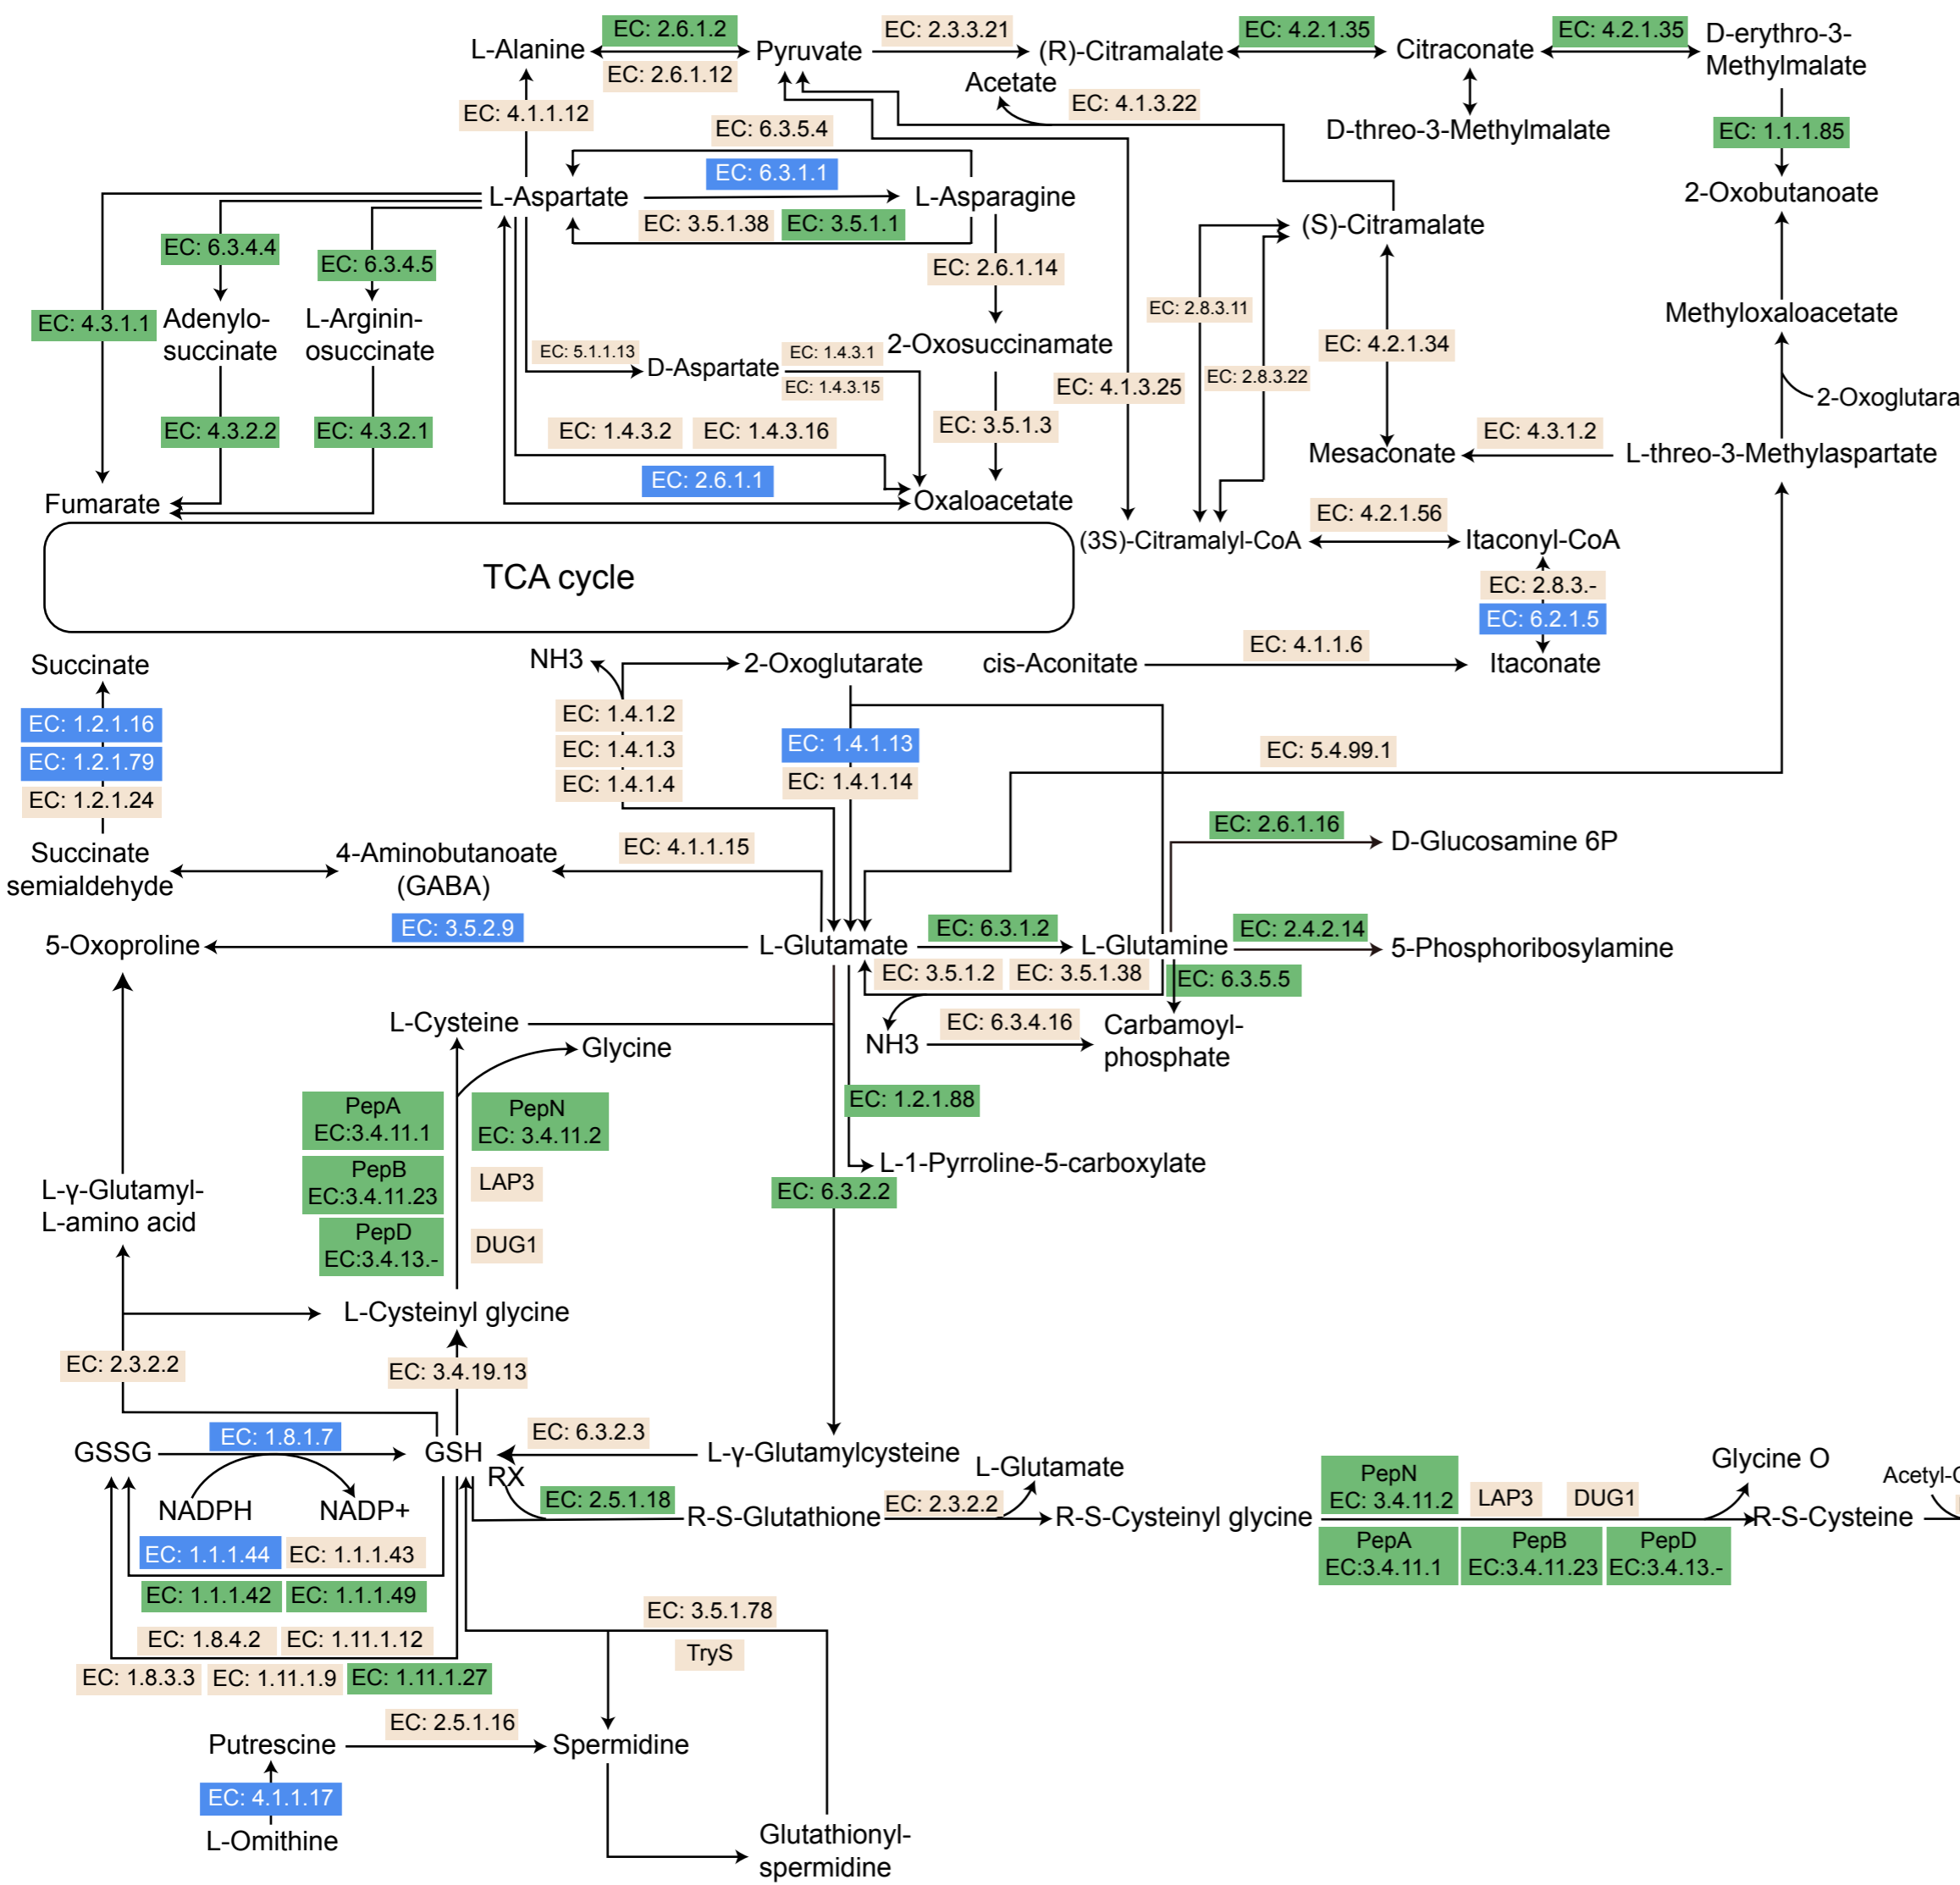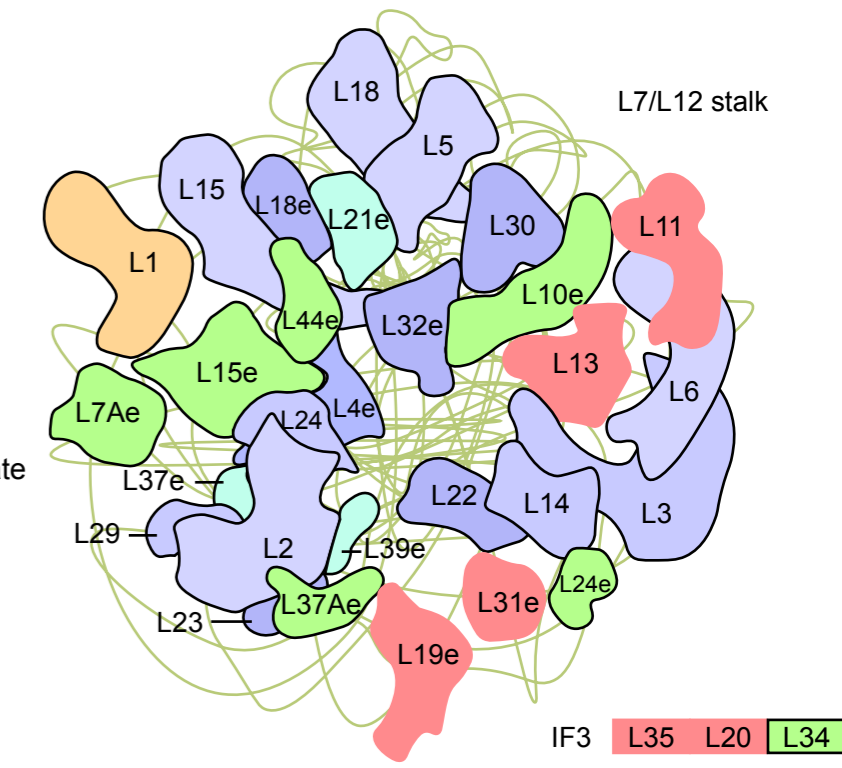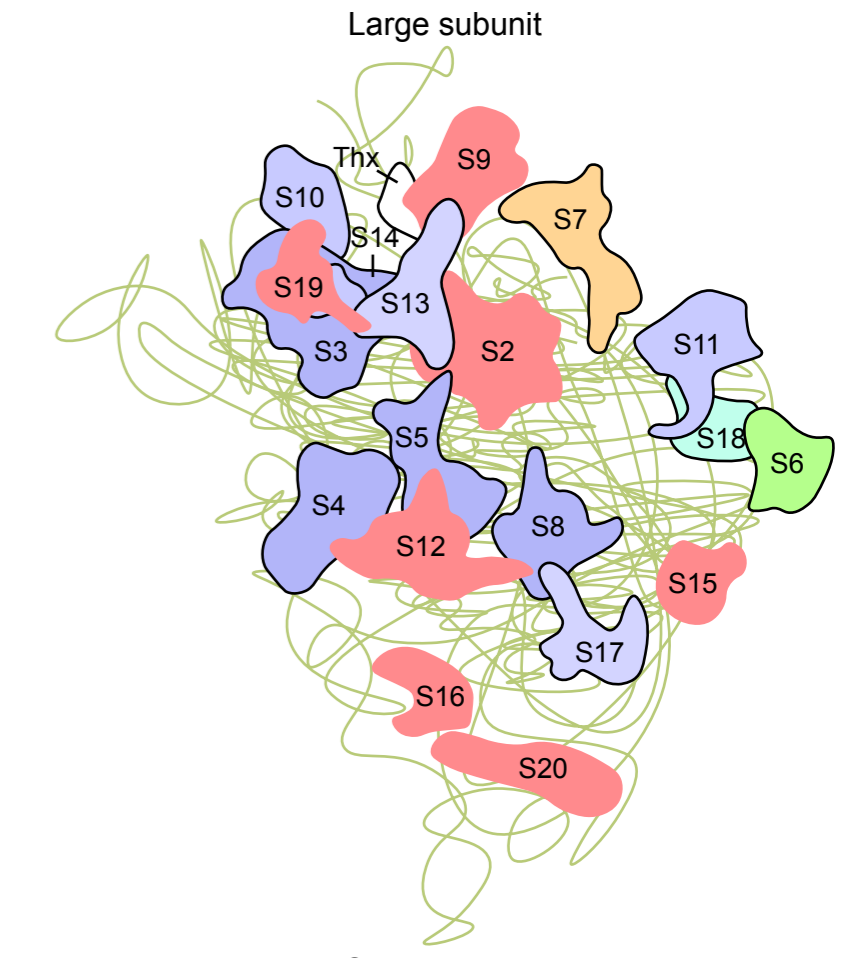

|                    |                              |
|--------------------|------------------------------|
| Enzyme             | Not detected                 |
| Enzyme             | Detected but not significant |
| Enzyme             | Down regulated               |
| Ribosomal proteins | Up regulated                 |
